# Supplementary material
Source: publisher figshare collection journal article supplement (https://acs.figshare.com/ndownloader/files/9570724)
Supplement: Supplementary file 1 [file 9570724]

# Supporting Information for

## Carbon Nanotubes versus Graphene as Flexible Transparent Electrodes in Inverted Perovskite Solar Cells

*Il Jeon,<sup>†+</sup> Jungjin Yoon,<sup>‡+</sup> Namyoung Ahn,<sup>‡</sup> Mohamed Atwa,<sup>†</sup> Clement Delacou,<sup>†</sup> Anton Anisimov,<sup>#</sup>  
Esko I. Kauppinen,<sup>§</sup> Mansoo Choi,<sup>‡\*</sup> Shigeo Maruyama,<sup>†,&\*</sup> and Yutaka Matsuo,<sup>†,&\*</sup>*

<sup>†</sup>: Department of Mechanical Engineering, School of Engineering, The University of Tokyo, Tokyo 113- 8656, Japan

<sup>‡</sup>: Department of Mechanical and Aerospace Engineering, Seoul National University, Seoul 08826, South Korea

<sup>#</sup>: Canatu Ltd., Konalankuja 5, FI-00390 Helsinki, Finland

<sup>§</sup>: Department of Applied Physics, Aalto University School of Science, FI-00076 Aalto, Finland

<sup>&</sup>: National Institute of Advanced Industrial Science and Technology (AIST), Ibaraki 305-8564, Japan

<sup>£</sup>: Hefei National Laboratory for Physical Sciences at Microscale, University of Science and Technology of China, Anhui 230026, China

Corresponding to:

mchoi@snu.ac.kr, maruyama@photon.t.u-tokyo.ac.jp, matsuo@photon.t.u-tokyo.ac.jp



## 1. Cross-sectional SEM images

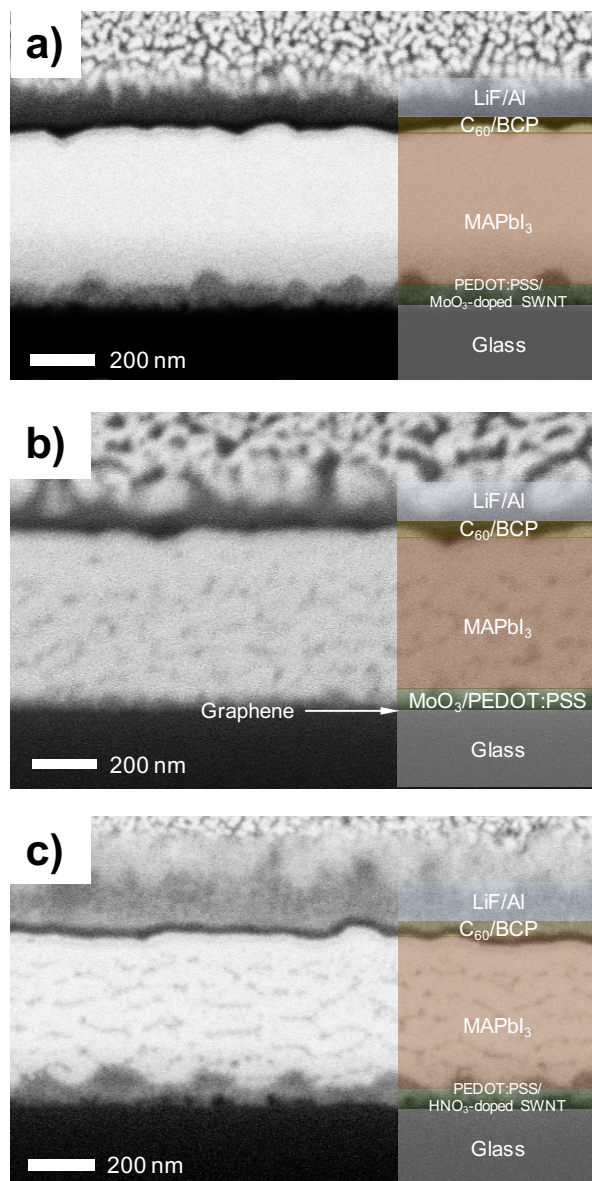

**Figure S1.** Cross-sectional SEM images of (a) the thin MoO<sub>3</sub>-doped SWNT-based PSCs, (b) the thin MoO<sub>3</sub>-doped graphene-based PSCs, and (c) the HNO<sub>3</sub>-doped SWNT-based PSCs,



## 2. Photoelectron Yield Spectroscopy (PYS)

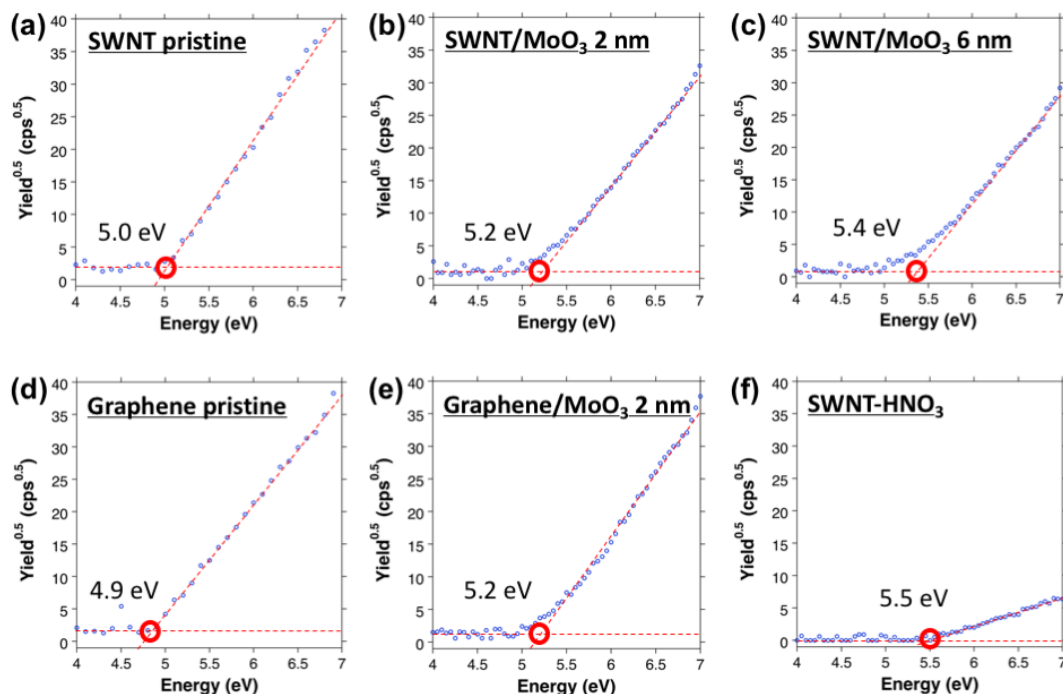

**Figure S2.** PYS data of (a) a pristine SWNT film on glass, (b) a glass/SWNT/MoO<sub>3</sub> (2nm) film, (c) a glass/SWNT/MoO<sub>3</sub> (6nm), (d) a pristine graphene film on glass, (e) a glass/graphene/MoO<sub>3</sub> (2 nm), and (f) a HNO<sub>3</sub>-doped SWNT film on glass.

## 3. UV-Vis Transmittance data

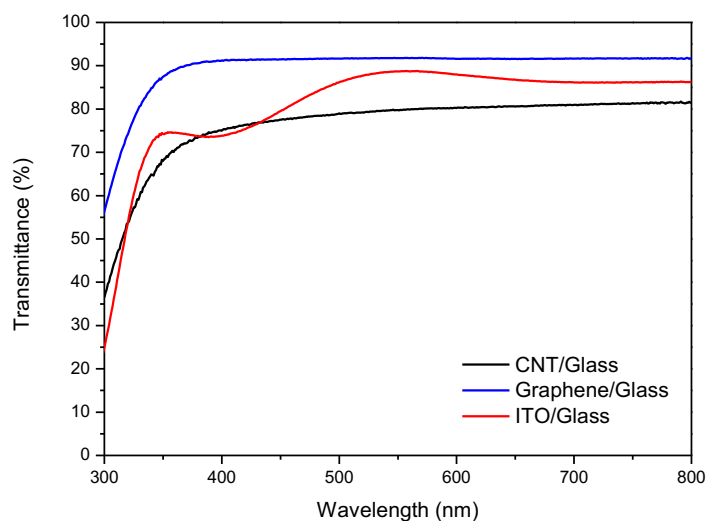

**Figure S3.** UV-vis spectra of a SWNT film on glass, a graphene film on glass, and ITO on glass.



## 4. Four-probe measurement

**Table S1.** Sheet resistance data of different carbon electrode films.

| Samples                                 | Sheet Resistance ( $\Omega \text{ sq.}^{-1}$ ) |
|-----------------------------------------|------------------------------------------------|
| Pristine SWNT                           | <i>ca.</i> 250                                 |
| HNO <sub>3</sub> -SWNT                  | 51 $\pm$ 10                                    |
| 2-nm-thick MoO <sub>3</sub> on SWNT     | 218 $\pm$ 5                                    |
| 6-nm-thick MoO <sub>3</sub> on SWNT     | 201 $\pm$ 7                                    |
| Pristine graphene                       | 625 $\pm$ 107                                  |
| 2-nm-thick MoO <sub>3</sub> on graphene | 501 $\pm$ 43                                   |

## 5. SEM top images

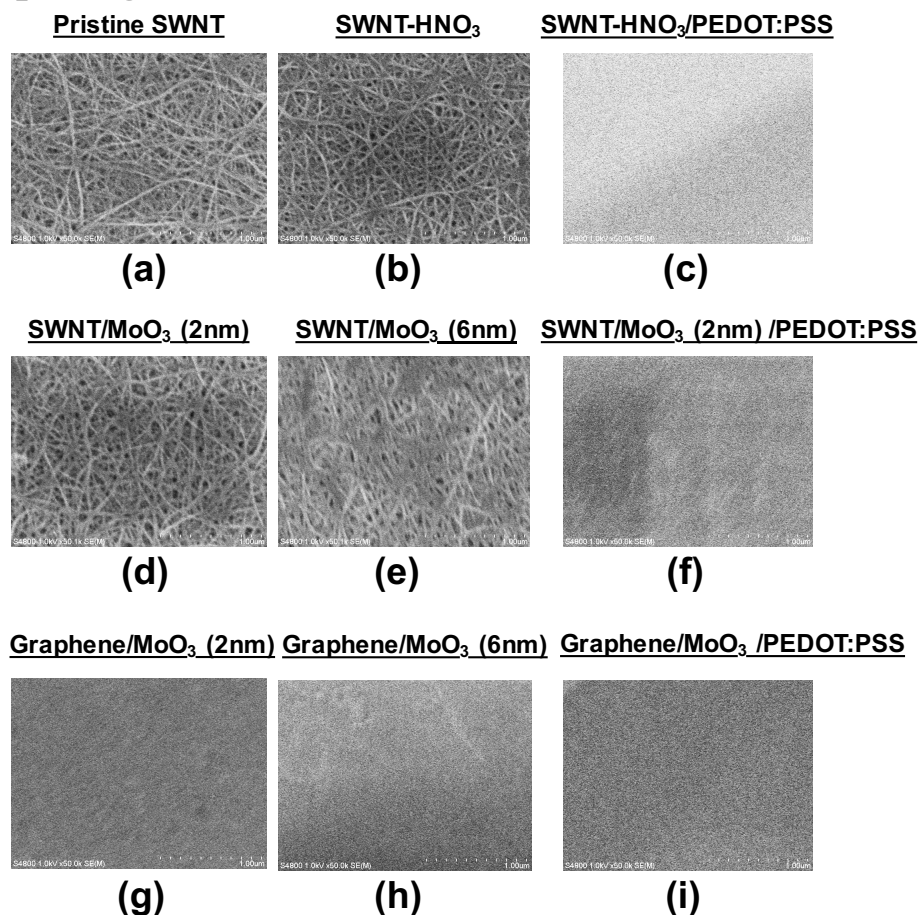

**Figure S4.** SEM images of (a) a pristine SWNT film, (b) a HNO<sub>3</sub>-doped SWNT film, (c) a HNO<sub>3</sub>-doped SWNT film with a PEDOT:PSS overcoat, (d) a 2-nm-thick MoO<sub>3</sub>-deposited SWNT film, (e) a 6-nm-thick MoO<sub>3</sub>-deposited SWNT film, (f) a 2-nm-thick MoO<sub>3</sub>-deposited SWNT film with a PEDOT:PSS overcoat (g) a pristine graphene (h) a 2-nm-thick MoO<sub>3</sub>-deposited graphene, and (i) a 2-nm-thick MoO<sub>3</sub>-deposited graphene with a PEDOT:PSS overcoat.



## 6. Hysteresis Data

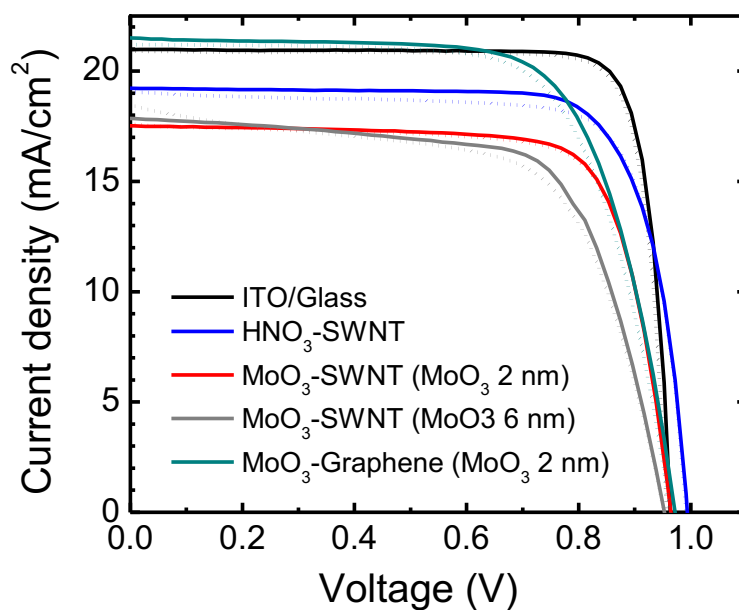

**Figure S5.**  $J$ - $V$  hysteresis curves of the devices tested in this study. Reverse bias is represented in solid lines, and forward bias is represented in dotted lines.

## 7. Statistical Analysis

**Table S2.** Statistical analysis of the carbon electrode-based PSCs in this work.

| Substrate | Anode                                      | $V_{oc}$ (V)    | $J_{sc}$ ( $\text{mA cm}^{-2}$ ) | FF              | PCE             |
|-----------|--------------------------------------------|-----------------|----------------------------------|-----------------|-----------------|
| glass     | SWNT/MoO <sub>3</sub> (2nm)/PEDOT:PSS      | 0.94 $\pm$ 0.05 | 18.6 $\pm$ 0.9                   | 0.68 $\pm$ 0.05 | 11.8% $\pm$ 1.0 |
|           | SWNT/MoO <sub>3</sub> (6nm)/PEDOT:PSS      | 0.90 $\pm$ 0.04 | 18.5 $\pm$ 0.4                   | 0.67 $\pm$ 0.03 | 11.1% $\pm$ 0.7 |
|           | graphene/ MoO <sub>3</sub> (2nm)/PEDOT:PSS | 0.98 $\pm$ 0.02 | 21.3 $\pm$ 0.5                   | 0.69 $\pm$ 0.04 | 14.2% $\pm$ 0.7 |
|           | SWNT-HNO <sub>3</sub> /PEDOT:PSS           | 0.94 $\pm$ 0.06 | 19.8 $\pm$ 0.6                   | 0.74 $\pm$ 0.03 | 13.7% $\pm$ 1.3 |
| PEN       | SWNT/MoO <sub>3</sub> /PEDOT:PSS           | 0.92 $\pm$ 0.01 | 18.5 $\pm$ 0.7                   | 0.60 $\pm$ 0.05 | 10.2% $\pm$ 0.9 |
|           | graphene/MoO <sub>3</sub> /PEDOT:PSS       | 0.99 $\pm$ 0.01 | 19.9 $\pm$ 0.2                   | 0.68 $\pm$ 0.09 | 13.4% $\pm$ 0.2 |



## 8. Four-Probe Tests involving Bending and Stretching

**Table S3.**  $R_{\text{Sheet}}$  of SWNT and graphene on PDMS after stretching 0.2% for 200 times.

| Samples                                     | Sheet Resistance ( $\Omega \text{ sq.}^{-1}$ ) |
|---------------------------------------------|------------------------------------------------|
| SWNT on PDMS                                | 250 $\pm$ 30                                   |
| SWNT on PDMS after 200 times stretching     | 261 $\pm$ 25                                   |
| graphene on PDMS                            | 625 $\pm$ 107                                  |
| graphene on PDMS after 200 times stretching | 771 $\pm$ 214                                  |

## 9. Raman Mapping

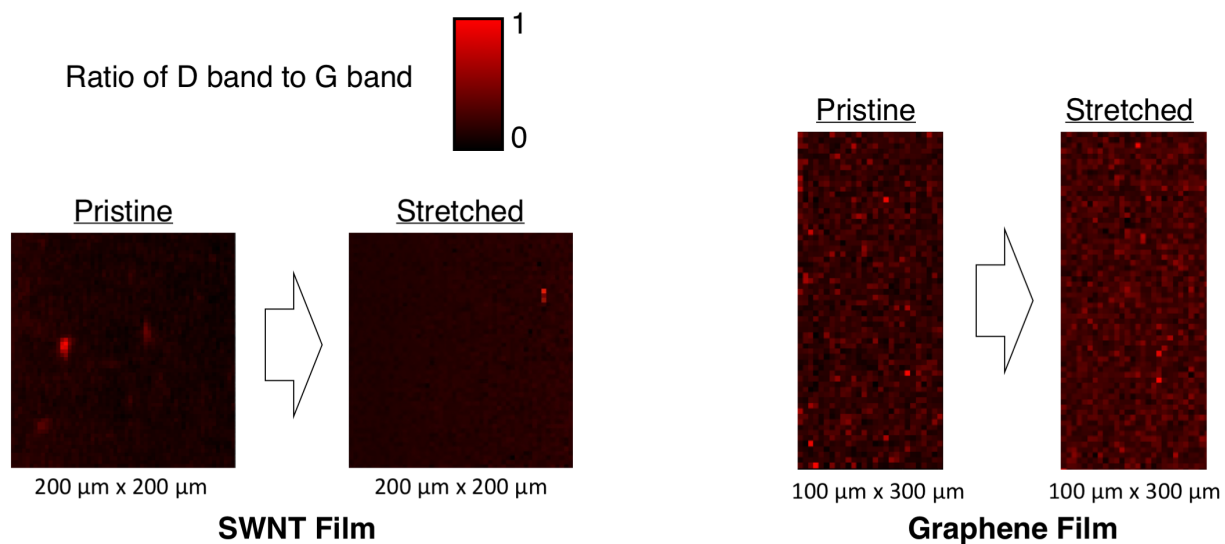

**Figure S6.** Raman spectroscopy mapping image of the SWNT film and graphene film. The image indicates ratio of D band to G band in which defects are indicated by the color, red.



## 10. $\text{HNO}_3$ doping on SWNT on PEN

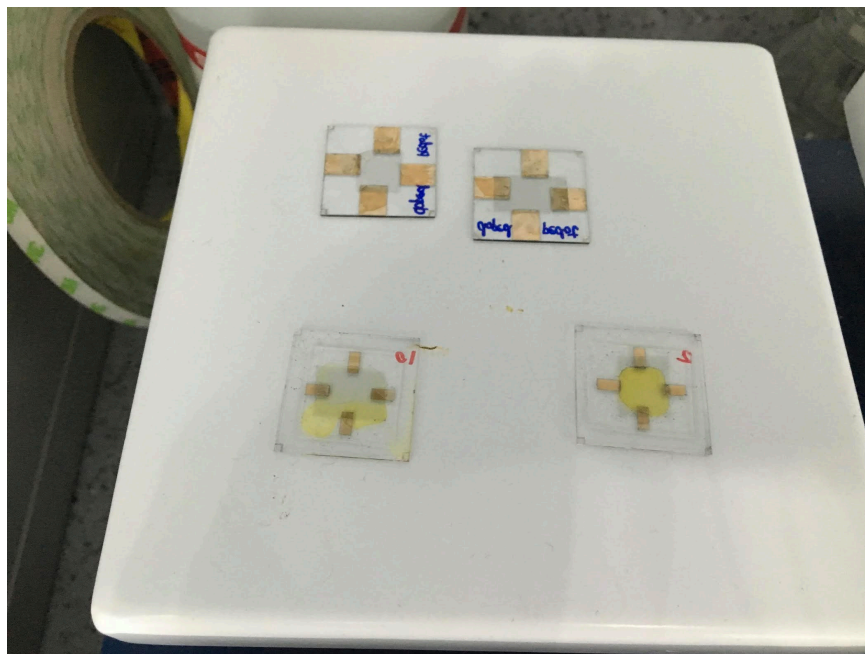

**Figure S7.** Picture of  $\text{HNO}_3$ -doped SWNT on PEN.
